# 1 Transcriptomic response of *Nitrosomonas europaea* transitioned from 2 ammonia- to oxygen-limited steady-state growth

3  
4 Christopher J. Sedlacek<sup>1,2\*,#</sup>, Andrew T. Giguere<sup>1,3,7\*</sup>, Michael D. Dobie<sup>4</sup>, Brett L. Mellbye<sup>4</sup>, Rebecca V  
5 Ferrell<sup>5</sup>, Dagmar Woebken<sup>1</sup>, Luis A. Sayavedra-Soto<sup>6</sup>, Peter J. Bottomley<sup>3,4</sup>, Holger Daims<sup>1,2</sup>, Michael  
6 Wagner<sup>1,2,7</sup>, Petra Pjevac<sup>1,8</sup>

7 <sup>1</sup>University of Vienna, Centre for Microbiology and Environmental Systems Science, Division of Microbial  
8 Ecology, Vienna, 1090, Austria.

9 <sup>2</sup>University of Vienna, The Comammox Research Platform, Vienna, 1090 Austria.

10 <sup>3</sup>Department of Crop and Soil Science, Oregon State University, Corvallis, OR, 97331, USA.

11 <sup>4</sup>Department of Microbiology, Oregon State University, Corvallis, OR, 97331, USA.

12 <sup>5</sup>Department of Biology, Metropolitan State University of Denver, Denver, CO 80217, USA

13 <sup>6</sup>Department of Botany and Plant Pathology, Oregon State University, Corvallis, OR, 97331, USA

14 <sup>7</sup>Center for Microbial Communities, Department of Chemistry and Bioscience, Aalborg University,  
15 Denmark

16 <sup>8</sup>Joint Microbiome Facility of the Medical University of Vienna and the University of Vienna, Vienna,  
17 Austria

18

## 19 **Keywords:**

20 Transcriptome, ammonia and oxygen limitation, chemostat, ammonia-oxidizing bacteria, *Nitrosomonas*  
21 *europaea*

22

23 \*These authors contributed equally

24 **Running Title:** Oxygen-limited growth of *Nitrosomonas europaea*

25 # Address correspondence to:  
26 Chris Sedlacek  
27 University of Vienna  
28 Althstrasse 14  
29 1090 Vienna,  
30 Austria  
31 Email: [sedlacek@microbial-ecology.net](mailto:sedlacek@microbial-ecology.net)  
32 Phone: +43 1 4277 91237  
33

34 Abstract word count: 250

35 Text word count: 4885

36

## 37 **Abstract**

38 Ammonia-oxidizing microorganisms perform the first step of nitrification, the oxidation of  
39 ammonia to nitrite. The bacterium *Nitrosomonas europaea* is the best characterized ammonia oxidizer to  
40 date. Exposure to hypoxic conditions has a profound effect on the physiology of *N. europaea*, e.g. by  
41 inducing nitrifier denitrification, resulting in increased nitric and nitrous oxide production. This metabolic  
42 shift is of major significance in agricultural soils, as it contributes to fertilizer loss and global climate  
43 change. Previous studies investigating the effect of oxygen limitation on *N. europaea* have focused on  
44 the transcriptional regulation of genes involved in nitrification and nitrifier denitrification. Here, we  
45 combine steady-state cultivation with whole genome transcriptomics to investigate the overall effect of  
46 oxygen limitation on *N. europaea*. Under oxygen-limited conditions, growth yield was reduced and  
47 ammonia to nitrite conversion was not stoichiometric, suggesting the production of nitrogenous gases.  
48 However, the transcription of the principal nitric oxide reductase (cNOR) did not change significantly  
49 during oxygen-limited growth, while the transcription of the nitrite reductase-encoding gene (*nirK*) was  
50 significantly lower. In contrast, both heme-copper containing cytochrome *c* oxidases encoded by *N.*  
51 *europaea* were upregulated during oxygen-limited growth. Particularly striking was the significant  
52 increase in transcription of the B-type heme-copper oxidase, proposed to function as a nitric oxide  
53 reductase (sNOR) in ammonia-oxidizing bacteria. In the context of previous physiological studies, as well  
54 as the evolutionary placement of *N. europaea*'s sNOR with regards to other heme-copper oxidases,  
55 these results suggest sNOR may function as a high-affinity terminal oxidase in *N. europaea* and other  
56 AOB.

## 57 **Importance**

58           Nitrification is a ubiquitous, microbially mediated process in the environment and an essential  
59 process in engineered systems such as wastewater and drinking water treatment plants. However,  
60 nitrification also contributes to fertilizer loss from agricultural environments increasing the eutrophication  
61 of downstream aquatic ecosystems and produces the greenhouse gas nitrous oxide. As ammonia-  
62 oxidizing bacteria are the most dominant ammonia-oxidizing microbes in fertilized agricultural soils,  
63 understanding their response to a variety of environmental conditions is essential for curbing the  
64 negative environmental effects of nitrification. Notably, oxygen limitation has been reported to  
65 significantly increase nitric oxide and nitrous oxide production during nitrification. Here we investigate the  
66 physiology of the best characterized ammonia-oxidizing bacterium, *Nitrosomonas europaea*, growing  
67 under oxygen-limited conditions.

## 68 **1 Introduction**

69 Nitrification is a microbially mediated, aerobic process involving the successive oxidation of  
70 ammonia ( $\text{NH}_3$ ) and nitrite ( $\text{NO}_2^-$ ) to nitrate ( $\text{NO}_3^-$ ) (1). In oxic environments, complete nitrification is  
71 accomplished through the complimentary metabolisms of ammonia-oxidizing bacteria (AOB) / archaea  
72 (AOA) and nitrite-oxidizing bacteria (NOB), or by comammox bacteria (2, 3). The existence of nitrite-  
73 oxidizing archaea (NOA) has been proposed, but not yet confirmed (4). Although an essential process  
74 during wastewater and drinking water treatment, nitrification is also a major cause of nitrogen (N) loss  
75 from N amended soils. Nitrifiers increase N loss through the production of  $\text{NO}_3^-$ , which is more  
76 susceptible to leaching from soils than ammonium ( $\text{NH}_4^+$ ), serves as terminal electron acceptor for  
77 denitrifiers, and contributes to the eutrophication of downstream aquatic environments (5).

78 In addition, ammonia oxidizers produce and release nitrogenous gases such as nitric (NO) and  
79 nitrous ( $\text{N}_2\text{O}$ ) oxide during  $\text{NH}_3$  oxidation at a wide range of substrate and oxygen ( $\text{O}_2$ ) concentrations (6,  
80 7). Nitrogenous gases are formed through enzymatic processes (8-13), but also by a multitude of  
81 chemical reactions that use the key metabolites of ammonia oxidizers, hydroxylamine ( $\text{NH}_2\text{OH}$ ) and  $\text{NO}_2^-$   
82 (or its acidic form  $\text{HNO}_2$ ), as the main precursors (14, 15). AOB, in particular, release NO and  $\text{N}_2\text{O}$  either  
83 during  $\text{NH}_2\text{OH}$  oxidation (16-21) or via nitrifier denitrification - the reduction of  $\text{NO}_2^-$  to  $\text{N}_2\text{O}$  via NO (22-  
84 25). The first pathway is the dominant process at atmospheric  $\text{O}_2$  levels, while the latter is more  
85 important under  $\text{O}_2$ -limited (hypoxic) conditions (26, 27), where  $\text{NO}_2^-$  and NO serve as alternative sinks  
86 for electrons generated by  $\text{NH}_3$  oxidation.

87 *Nitrosomonas europaea* strain ATCC 19718 was the first AOB to have its genome sequenced  
88 (28), and is widely used as a model organism in physiological studies of  $\text{NH}_3$  oxidation and NO/ $\text{N}_2\text{O}$   
89 production in AOB (27, 29-36). The enzymatic background of NO and  $\text{N}_2\text{O}$  production in *N. europaea* is  
90 complex and involves multiple interconnected processes (Fig. 1). Most AOB encode a copper-containing  
91 nitrite reductase, NirK, which is necessary for efficient  $\text{NH}_3$  oxidation by *N. europaea* at atmospheric  $\text{O}_2$   
92 levels. NirK is also involved in but not essential for NO production during nitrifier denitrification in *N.*  
93 *europaea* (26, 27, 29, 35), and is upregulated in response to high  $\text{NO}_2^-$  concentrations (37). Moreover,  
94 two forms of membrane-bound cytochrome (cyt) c oxidases (cNOR and sNOR), and three cytochromes

95 referred to as cyt P460 (CytL), cyt *c'* beta (CytS) and cyt *c*<sub>554</sub> (CycA), have been implicated in N<sub>2</sub>O  
96 production in *N. europaea* and other AOB (12, 24, 32, 38-40). However, the involvement of cyt *c*<sub>554</sub> in  
97 N<sub>2</sub>O production has recently been disputed (41). Finally, recent research has confirmed that the  
98 oxidation of NH<sub>3</sub> to NO<sub>2</sub><sup>-</sup> in AOB includes the formation of NO as an obligate intermediate, produced by  
99 NH<sub>2</sub>OH oxidation via the hydroxylamine dehydrogenase (HAO) (20). The enzyme responsible for the  
100 oxidation of NO to NO<sub>2</sub><sup>-</sup> (the proposed nitric oxide oxidase) has not yet been identified (40).

101 The production of NO and N<sub>2</sub>O by *N. europaea*, grown under oxic as well as hypoxic conditions,  
102 has been previously demonstrated and quantified in multiple batch and chemostat culture studies (11,  
103 12, 34, 35, 42, 43). Furthermore, recent studies have investigated the instantaneous rate of NO and N<sub>2</sub>O  
104 production by *N. europaea* during the transition from oxic to hypoxic or anoxic conditions (12, 35, 36).  
105 Despite this large body of literature describing the effect of oxygen (O<sub>2</sub>) limitation on NH<sub>3</sub> oxidation and  
106 NO/N<sub>2</sub>O production in *N. europaea*, little attention has been paid to the regulation of other processes  
107 under these conditions. Previous studies have utilized reverse transcription quantitative polymerase  
108 chain reaction (RT-qPCR) assays to examine transcriptional patterns of specific, mainly N-cycle related  
109 genes in AOB grown under O<sub>2</sub>-limited conditions (34, 36, 44). To date, no study has evaluated the global  
110 transcriptomic response of *N. europaea* to O<sub>2</sub>-limited growth. However, research on the effect of  
111 stressors other than reduced O<sub>2</sub> tension have demonstrated the suitability of transcriptomics for the  
112 analysis of physiological responses in AOB (43, 45-48).

113 *N. europaea* utilizes the Calvin-Benson-Bassham (CBB) cycle to fix inorganic carbon (28, 49).  
114 Whereas all genome-sequenced AOB appear to use the CBB cycle, differences exist in the number of  
115 copies of ribulose-1,5-bisphosphate carboxylase/oxygenase (RuBisCO) genes encoded, as well as the  
116 presence or absence of carbon dioxide (CO<sub>2</sub>) concentrating mechanisms (50-52). *N. europaea* encodes  
117 a single Form IA green-like (high affinity) RuBisCO enzyme and two carbonic anhydrases, but no  
118 carboxysome related genes (28). RuBisCO is considered to function optimally in hypoxic environments,  
119 as it also uses O<sub>2</sub> as a substrate and produces the off-path intermediate 2-phosphoglycolate (53, 54).  
120 However, the effect of O<sub>2</sub> limitation on the transcription of RuBisCO encoding genes and resulting growth  
121 yield in AOB is still poorly understood.

122 In this study, we expand upon previous work investigating the effects of O<sub>2</sub> limitation on *N.*  
123 *europaea*, by profiling the transcriptomic response to substrate (NH<sub>3</sub>) versus O<sub>2</sub> limitation. *N. europaea*  
124 was grown under steady-state NH<sub>3</sub>- or O<sub>2</sub>-limited conditions, which allowed for the investigation of  
125 differences in transcriptional patterns between growth conditions. We observed a downregulation of  
126 genes associated with CO<sub>2</sub> fixation, as well as increased expression of two distinct heme-copper  
127 containing cytochrome *c* oxidases (HCOs) during O<sub>2</sub>-limited growth. Our results provide new insights into  
128 how *N. europaea* physiologically adapts to thrive in O<sub>2</sub>-limited environments, and identified putative key  
129 enzymes for future biochemical characterization.

130

## 131 **2 Materials and Methods**

### 132 **2.1 Cultivation**

133 *N. europaea* ATCC 19718 was cultivated at 30°C, as a batch and continuous chemostat culture  
134 as previously described (43, 48). Briefly, *N. europaea* was grown in mineral media containing 30 mmol L<sup>-1</sup>  
135 (NH<sub>4</sub>)<sub>2</sub>SO<sub>4</sub>, 0.75 mmol L<sup>-1</sup> MgSO<sub>4</sub>, 0.1 mmol L<sup>-1</sup> CaCl<sub>2</sub>, and trace minerals (10 μmol L<sup>-1</sup> FeCl<sub>3</sub>, 1.0 μmol  
136 L<sup>-1</sup> CuSO<sub>4</sub>, 0.6 μmol L<sup>-1</sup> Na<sub>2</sub>Mo<sub>4</sub>O<sub>4</sub>, 1.59 μmol L<sup>-1</sup> MnCl<sub>2</sub>, 0.6 μmol L<sup>-1</sup> CoCl<sub>2</sub>, 0.096 μmol L<sup>-1</sup> ZnCl<sub>2</sub>). After  
137 sterilization by autoclaving, the media was buffered by the addition of 6 mL L<sup>-1</sup> autoclaved phosphate-  
138 carbonate buffer solution (0.52 mmol L<sup>-1</sup> NaH<sub>2</sub>PO<sub>4</sub> × H<sub>2</sub>O, 3.5 mmol L<sup>-1</sup> KH<sub>2</sub>PO<sub>4</sub>, 0.28 mmol L<sup>-1</sup> Na<sub>2</sub>CO<sub>3</sub>,  
139 pH adjusted to 7.0 with HCl).

140 For steady-state growth, a flow through bioreactor (Applikon Biotechnology) with a 1 L working  
141 volume was inoculated with 2% (v/v) of an exponential phase *N. europaea* batch culture. The bioreactor  
142 was set to 'batch' mode until the NH<sub>4</sub><sup>+</sup> concentration reached <5 mmol L<sup>-1</sup> (six days; Table S1).  
143 Subsequently, the bioreactor was switched to continuous flow 'chemostat' mode, at a dilution rate /  
144 specific growth rate (μ) of 0.01 h<sup>-1</sup> (doubling time = ~70 hours), which was controlled by a peristaltic  
145 pump (Thermo Scientific). The culture was continuously stirred at 400 rpm and the pH was automatically  
146 maintained at 7.0 ± 0.1 by addition of sterile 0.94 mol L<sup>-1</sup> (10% w/v) Na<sub>2</sub>CO<sub>3</sub> solution. Sterile filtered (0.2  
147 μm) air, at a rate of 40 ml min<sup>-1</sup>, was supplied during batch and NH<sub>3</sub>-limited steady-state growth. Once

148 NH<sub>3</sub>-limited steady-state was reached (day 7), the chemostat was continuously operated under NH<sub>3</sub>-  
149 limited conditions for 10 days. To transition to O<sub>2</sub>-limited steady-state growth, after day 16, the air input  
150 was stopped and the stirring speed was increased to 800 rpm to facilitate gas exchange between the  
151 medium and the headspace. O<sub>2</sub>-limited steady-state growth was achieved on day 23 as defined by the  
152 persistence of 26.4 - 31 mmol L<sup>-1</sup> NH<sub>4</sub><sup>+</sup> and the accumulation of 22.8 – 25.5 mmol L<sup>-1</sup> NO<sub>2</sub><sup>-</sup> in the growth  
153 medium. The culture was continuously grown under these conditions for 10 days.

154 Sterile samples (~5 mL) were taken on a daily basis. Culture purity was assessed by periodically  
155 inoculating ~100 µl of culture onto lysogeny broth (Sigma-Aldrich) agar plates, which were incubated at  
156 30°C for at least 4 days. Any observed growth on agar plates was considered to be a contamination and  
157 those cultures were discarded. NH<sub>4</sub><sup>+</sup> and NO<sub>2</sub><sup>-</sup> concentrations were determined colorimetrically (55) and  
158 cell density was determined spectrophotometrically (Beckman) by making optical density measurements  
159 at 600 nm (OD<sub>600</sub>) (Table S1). Total biomass in grams dry cell weight per liter (gDCW L<sup>-1</sup>), substrate-  
160 consumption rate (q<sub>NH<sub>3</sub></sub>), and apparent growth yield (Y) were calculated as described in Mellbye *et al.*  
161 (2016). To test for statistically significant differences in NH<sub>4</sub><sup>+</sup> to NO<sub>2</sub><sup>-</sup> conversion stoichiometry, q<sub>NH<sub>3</sub></sub>, and  
162 Y between NH<sub>3</sub>- and O<sub>2</sub>-limited steady-state growth, a Welch's t-test was performed.

163

## 164 **2.2 RNA extraction and transcriptome sequencing**

165 For RNA extraction and transcriptome sequencing, three replicate samples (40 mL) were  
166 collected on three separate days during NH<sub>3</sub>-limited (days 9, 10, 11) and O<sub>2</sub>-limited (days 28, 29, 30)  
167 steady-state growth (Fig. 2). The samples were harvested by centrifugation (12,400 x g, 30 min, 4°C),  
168 resuspended in RNeasy RLT buffer with 2-mercaptoethanol, and lysed with an ultrasonication probe (3.5  
169 output, Pulse of 30 sec on / 30 sec off for 1 min; Heatsystems Ultrasonic Processor XL). RNA was  
170 extracted using the RNeasy minikit (Qiagen) followed by the MICROBExpress-bacteria RNA Purification  
171 Kit (Ambion/Life technologies) following the manufacturer's instructions. Depleted RNA quality was  
172 assessed using the Bioanalyzer 6000 Nano Lab-Chip Kit (Agilent Technologies). Sequencing libraries  
173 were constructed from at least 200 ng rRNA-depleted RNA with the TruSeq targeted RNA expression Kit



174 (Illumina), and 100 bp paired-end libraries were sequenced on a HiSeq 2000 (Illumina) at the Center for  
175 Genome Research and Biocomputing Core Laboratories (CGRB) at Oregon State University.

176

### 177 **2.3 Transcriptome analysis**

178 Paired-end transcriptome sequence reads were processed and mapped to open reading frames  
179 (ORFs) deposited at NCBI for the *N. europaea* ATCC 19718 (NC\_004757.1) reference genome using  
180 the CLC Genomics Workbench (CLC bio) under default parameters as previously described (43).  
181 Residual reads mapping to the rRNA operon were excluded prior to further analysis. An additive  
182 consensus read count was manually generated for all paralogous genes. Thereafter, mapped read  
183 counts for each gene were normalized to the gene length in kilobases, and the resulting read per  
184 kilobase (RPK) values were converted to transcripts per million (TPM) (56). To test for statistically  
185 significant differences between transcriptomes obtained from NH<sub>3</sub>- and O<sub>2</sub>-limited steady-state growth,  
186 TPMs of biological triplicate samples were used to calculate p-values based on a Welch's t-test. The  
187 more stringent Welch's, rather than the Student's t-Test was selected due to the limited number of  
188 biological replicates (57). Additionally, linear fold changes between average TPMs under both growth  
189 conditions for each expressed ORF were calculated. Transcripts with a p-value  $\leq 0.05$  and a transcription  
190 fold change of  $\geq 1.5x$  between conditions were considered to be present at significantly different levels.

191 All retrieved transcriptome sequence data has been deposited in the European Nucleotide  
192 Archive (ENA) under the project accession number PRJEB31097.

193

## 194 **3 Results and discussion**

### 195 **3.1 Growth characteristics**

196 *N. europaea* was grown as a continuous steady-state culture under both NH<sub>3</sub>- and O<sub>2</sub>-limited  
197 growth conditions. During NH<sub>3</sub>-limited steady-state growth, the culture was kept oxic with a constant  
198 supply of filtered atmospheric air, was continuously stirred (400 rpm), and contained a standing NO<sub>2</sub><sup>-</sup>  
199 concentration of  $\sim 60 \text{ mmol L}^{-1}$ . In contrast, during O<sub>2</sub>-limited steady-state growth, no additional air inflow

200 was provided, but the stirring was increased (800 rpm) to facilitate O<sub>2</sub> transfer between the headspace  
201 and growth medium. As a consequence of O<sub>2</sub> limitation, the medium contained standing concentrations  
202 (~30mmol L<sup>-1</sup>) of both NH<sub>4</sub><sup>+</sup> and NO<sub>2</sub><sup>-</sup> (Fig. 2, Table 1).

203 During NH<sub>3</sub>-limited steady-state growth (days 7-16; Fig. 2), *N. europaea* stoichiometrically  
204 oxidized all supplied NH<sub>4</sub><sup>+</sup> to NO<sub>2</sub><sup>-</sup> (N-balance = 61.0 ±1.7 mmol L<sup>-1</sup>) and maintained an OD<sub>600</sub> of 0.15  
205 ±0.01 (Table 1). During O<sub>2</sub>-limited steady-state growth (days 23-32; Fig. 2), *N. europaea* was able to  
206 consume on average 31.1 ±1.5 mmol L<sup>-1</sup> (51.8%) of the supplied NH<sub>4</sub><sup>+</sup>, and maintained an OD<sub>600</sub> of 0.07  
207 ±0.01 (Table 1). A decrease in OD<sub>600</sub> was expected, as the O<sub>2</sub>-limited culture oxidized less total  
208 substrate (NH<sub>4</sub><sup>+</sup>), resulting in less biomass produced. The conversion of NH<sub>4</sub><sup>+</sup> to NO<sub>2</sub><sup>-</sup> was not  
209 stoichiometric during O<sub>2</sub>-limited growth, as only 77.5% (24.1 ±0.8 mmol L<sup>-1</sup>) of the NH<sub>4</sub><sup>+</sup> oxidized was  
210 measured as NO<sub>2</sub><sup>-</sup> in the effluent, resulting in an N-balance of 52.8 ±1.8 mmol L<sup>-1</sup> (Table 1). The  
211 significant difference (p ≤0.01) in the N-balance between NH<sub>4</sub><sup>+</sup> consumed and NO<sub>2</sub><sup>-</sup> formed during O<sub>2</sub>-  
212 limited growth is in accordance with previous reports and likely due to increased N-loss in the form of  
213 NH<sub>2</sub>OH, NO, and N<sub>2</sub>O during O<sub>2</sub>-limited conditions (12, 35, 42, 58).

214 The dilution rate (0.01 h<sup>-1</sup>) of the chemostat was kept constant during both NH<sub>3</sub>- and O<sub>2</sub>-limited  
215 growth, and resulted in 14.4 mmol day<sup>-1</sup> NH<sub>4</sub><sup>+</sup> delivered into the chemostat. On days (9, 10, and 11),  
216 which were sampled for NH<sub>3</sub>-limited growth transcriptomes, *N. europaea* consumed NH<sub>3</sub> at a rate (q<sub>NH<sub>3</sub></sub>)  
217 of 24.73 ±0.53 mmol gDCW<sup>-1</sup> h<sup>-1</sup> with an apparent growth yield (Y) of 0.40 ±0.01 gDCW mol<sup>-1</sup> NH<sub>3</sub>.  
218 During days (28, 29, and 30) sampled for O<sub>2</sub>-limited growth transcriptomes, the q<sub>NH<sub>3</sub></sub> was significantly  
219 higher (28.51 ±1.13 mmol gDCW<sup>-1</sup> h<sup>-1</sup>; p ≤0.05), while Y was significantly lower (0.35 ±0.01 gDCW mol<sup>-1</sup>  
220 NH<sub>3</sub>; p ≤0.05). When the whole ten day NH<sub>3</sub>- and O<sub>2</sub>-limited steady-state growth periods are considered  
221 the q<sub>NH<sub>3</sub></sub> and Y trends remain statistically significant (p ≤0.05) (Table 1). Overall, NH<sub>3</sub> oxidation was less  
222 efficiently coupled to biomass production under O<sub>2</sub>-limited growth conditions.

223

## 224 **3.2 Global transcriptomic response of *N. europaea* to growth under NH<sub>3</sub>- versus O<sub>2</sub>-limited** 225 **conditions**

226 Under both NH<sub>3</sub>- and O<sub>2</sub>-limited growth conditions, transcripts mapping to 2535 out of 2572  
227 protein coding genes (98.5%) and 3 RNA coding genes (*ffs*, *mpB*, and tmRNA) were detected. Many of  
228 the 37 genes not detected here encode phage elements or transposases, some of which may have been  
229 excised from the genome in the >15 years of culturing since genome sequencing (File S1). In addition,  
230 no tRNA transcripts were detected. The high proportion of transcribed genes is in line with recent *N.*  
231 *europaea* transcriptomic studies, where similarly high fractions of transcribed genes were detected (43,  
232 48). A significant difference in transcript levels between growth conditions was detected for 615 (~24%)  
233 of transcribed genes (Fig. S1). Of these 615 genes, 435 (~71%) were present at higher levels, while 180  
234 (~29%) were present at lower levels during O<sub>2</sub>-limited growth. Genes encoding hypothetical proteins with  
235 no further functional annotation accounted for ~21% (130) of the differentially transcribed genes (File  
236 S1). Steady-state growth under O<sub>2</sub>-limited conditions mainly impacted the transcription of genes in  
237 clusters of orthologous groups (COGs) related to transcription and translation, ribosome structure and  
238 biogenesis, carbohydrate transport and metabolism, as well as energy production and conversion (Fig.  
239 3).

240

## 241 **3.3 Universal and reactive oxygen stress**

242 The transcript levels of various chaperone proteins and sigma factors considered to be involved  
243 in general stress response in *N. europaea* (45) differed between NH<sub>3</sub>- and O<sub>2</sub>-limited growth with no  
244 discernible trend of regulation (Table S2, File S1). Overall, prolonged exposure to O<sub>2</sub> limitation did not  
245 seem to induce a significantly increased general stress response in *N. europaea*. Key genes involved in  
246 oxidative stress defense (superoxide dismutase, catalase, peroxidases, and thioredoxins) were  
247 transcribed at lower levels during O<sub>2</sub>-limited growth, as expected (Table S2, File S1). Surprisingly,  
248 rubredoxin (NE1426) and a glutaredoxin family protein-encoding gene (NE2328) did not follow this trend  
249 and were transcribed at significantly higher levels (2.8- and 1.8-fold, respectively) during O<sub>2</sub>-limited

250 growth (Table S2). Although their role in *N. europaea* is currently unresolved, both have been proposed  
251 to be involved in cellular oxidative stress response (60, 61), iron homeostasis (62, 63) or both.

252

### 253 **3.4 Carbon fixation, carbohydrate and storage compound metabolism**

254 There was a particularly strong effect of O<sub>2</sub>-limited growth on the transcription of several genes  
255 related to CO<sub>2</sub> fixation (Fig. 3b). The four genes of the RuBisCO-encoding *cbb* operon (*cbbOQSL*) were  
256 among the genes displaying the largest decrease in detected transcript numbers (Fig. 4; Table S2).  
257 Correspondingly, the transcriptional repressor of the *cbb* operon (*cbbR*) was transcribed at 4.5-fold  
258 higher levels (Fig. 4, Table S2). This agrees with the previously reported decrease in transcription of the  
259 *N. europaea cbbOQSL* operon in O<sub>2</sub>-limited batch culture experiments (64). The reduced transcription of  
260 RuBisCO-encoding genes potentially reflects a decreased RuBisCO enzyme concentration needed to  
261 maintain an equivalent CO<sub>2</sub> fixation rate during O<sub>2</sub>-limited growth. Since O<sub>2</sub> acts as a competing  
262 substrate for the RuBisCO active site, the CO<sub>2</sub> fixing carboxylase reaction proceeds more efficiently at  
263 lower O<sub>2</sub> concentrations (53, 65, 66). When *N. europaea* is grown under CO<sub>2</sub> limitation, the transcription  
264 of RuBisCO encoding genes increases significantly (43, 64, 67). Due to the absence of carboxysomes,  
265 *N. europaea* appears to regulate CO<sub>2</sub> fixation at the level of RuBisCO enzyme concentration.

266 Genes encoding the remaining enzymes of the CBB pathway and carbonic anhydrases were not  
267 significantly differentially regulated with the exception of the transketolase-encoding *cbbT* gene (Table  
268 S2). Likewise, almost no differences in transcription were observed for the majority of genes in other  
269 central metabolic pathways (glycolysis/gluconeogenesis, TCA cycle; File S1). As the specific growth rate  
270 of *N. europaea* was kept constant during both NH<sub>3</sub>- and O<sub>2</sub>-limited growth, it is not surprising that genes  
271 associated with these core catabolic pathways were transcribed at comparable levels.

272 Differential transcription of polyphosphate (PP) metabolism-related genes suggests an increased  
273 accumulation of PP storage during O<sub>2</sub>-limited growth. Transcripts of the polyphosphate kinase (*ppk*)  
274 involved in PP synthesis were detected in significantly higher numbers (2.1-fold), while transcription of  
275 the gene encoding the PP-degrading exopolyphosphatase (*ppx*) did not change (Table S2). Indeed, *N.*

276 *europaea* has previously been shown to accumulate PP when ATP generation (NH<sub>3</sub> oxidation) and ATP  
277 consumption become uncoupled and surplus ATP is available (68). As the specific growth rate was kept  
278 constant throughout the experiment, PP accumulation could be a result of increased efficiency in ATP-  
279 consuming pathways, like CO<sub>2</sub> fixation or oxidative stress induced repair. A decrease in the reaction flux  
280 through the energetically wasteful oxygenase reaction catalyzed by RuBisCO could result in surplus ATP  
281 being diverted to PP production.

282

### 283 **3.5 Energy conservation**

284 Genes encoding the known core enzymes of the NH<sub>3</sub> oxidation pathway in *N. europaea* were all  
285 highly transcribed during both NH<sub>3</sub>- and O<sub>2</sub>-limited growth (Table S2). These included the ammonia  
286 monooxygenase (AMO; *amoCAB* operons and the singleton *amoC* gene), as well as the HAO (*haoBA*)  
287 and the accessory cyt *c*<sub>554</sub> (*cycA*) and cyt *c*<sub>m552</sub> (*cycX*) encoding genes. Due to a high level of sequence  
288 conservation among the multiple AMO and HAO operons (69), it is not possible to decipher the  
289 transcriptional responses of paralogous genes in these clusters. Therefore, we report the regulation of  
290 AMO and HAO operons as single units (Table S2). The transcript numbers of genes in the AMO operons  
291 decreased up to 3.3-fold during O<sub>2</sub>-limited growth, while transcripts of the singleton *amoC* were present  
292 at 1.9-fold higher levels. However, these transcriptional differences were not statistically significant. The  
293 HAO cluster genes were also not significantly differentially transcribed (Table S2).

294 Previous research has shown that transcription of AMO, and to a lesser extent of HAO, is  
295 induced by NH<sub>3</sub> in a concentration dependent manner (70). In contrast, other studies have reported an  
296 increase in *amoA* transcription by *N. europaea* following substrate limitation (44, 71). Furthermore, *N.*  
297 *europaea* has been reported to increase *amoA* and *haoA* transcription during growth under low O<sub>2</sub>  
298 conditions (34). However, exposure to repeated transient anoxia did not significantly change *amoA* or  
299 *haoA* mRNA levels (36). As both NH<sub>3</sub>- and O<sub>2</sub> limitation have previously been shown to induce  
300 transcription of AMO and HAO encoding genes, the high transcription levels observed here under both  
301 NH<sub>3</sub>- and O<sub>2</sub>-limited steady-state growth conditions are not surprising.

302 The periplasmic red copper protein nitrosocyanin (NcyA) was among the most highly transcribed  
303 genes under both NH<sub>3</sub>- and O<sub>2</sub>-limited growth conditions (Table S2). Nitrosocyanin has been shown to  
304 be expressed at levels similar to other nitrification and electron transport proteins (72), and is among the  
305 most abundant proteins commonly found in AOB proteomes (47, 73). To date, the nitrosocyanin  
306 encoding gene *ncyA* has been identified only in AOB genomes (24), and has been proposed as a  
307 candidate for the nitric oxide oxidase (40). However, as comammox *Nitrospira* do not encode *ncyA* (2, 3,  
308 13), and neither do all genome sequenced AOB (74), nitrosocyanin cannot be the NO oxidase in all  
309 ammonia oxidizers. In this study, a slight (1.7-fold), but not statistically significantly higher number of  
310 *ncyA* transcripts was detected during O<sub>2</sub>-limited growth (Table S2). This agrees with a previous study  
311 comparing *ncyA* mRNA levels in *N. europaea* continuous cultures grown under high and low O<sub>2</sub>  
312 conditions (44). However, *N. europaea* performing pyruvate-dependent NO<sub>2</sub><sup>-</sup> reduction also significantly  
313 upregulated *ncyA*, while transcription of *amoA* and *haoA* decreased (44). Overall, there is evidence for  
314 an important role of nitrosocyanin in NH<sub>3</sub> oxidation or electron transport in AOB, but further experiments  
315 are needed to elucidate its exact function.

316 Three additional cytochromes are considered to be involved in the ammonia-oxidizing pathway of  
317 *N. europaea*: i) cyt *c*<sub>552</sub> (*cycB*), essential for electron transfer; ii) cyt P460 (*cytL*), responsible for N<sub>2</sub>O  
318 production from NO and hydroxylamine (39); and iii) cyt *c'*-beta (*cytS*), hypothesized to be involved in N-  
319 oxide detoxification and metabolism (24, 75). All three were among the most highly transcribed genes  
320 (top 20%) under both growth conditions (Table S2). In this study, *cytS* was transcribed at significantly  
321 lower levels (2.3-fold) during O<sub>2</sub>-limited growth. However, transcription of *cycB* and *cytL* were not  
322 significantly different (Table S2). While the *in vivo* function of *cytS* remains elusive, it is important to note  
323 that in contrast to *ncyA*, the *cytS* gene is present in all sequenced AOB and comammox *Nitrospira*  
324 genomes (12, 13, 52). The ubiquitous detection of *cytS* in genomes of all AOB, comammox *Nitrospira*,  
325 and in methane-oxidizing bacteria capable of NH<sub>3</sub> oxidation (76), indicates that cyt *c'*-beta might play an  
326 important, yet unresolved role in bacterial aerobic NH<sub>3</sub> oxidation.

327

### 328 3.6 Nitrifier denitrification

329 During O<sub>2</sub>-limited growth, *N. europaea* either performs nitrifier denitrification or experiences a  
330 greater loss of N intermediates like NH<sub>2</sub>OH (59) or NO (20), which leads to the observed N-imbalance  
331 between total NH<sub>4</sub><sup>+</sup> consumed and NO<sub>2</sub><sup>-</sup> produced (Fig. 2, Table 1). The Cu-containing NO<sub>2</sub><sup>-</sup> reductase  
332 NirK and the iron-containing membrane-bound cytochrome *c* dependent NO reductase (cNOR; NorBC) are  
333 considered to be the main nitrifier denitrification enzymes (24, 35). *N. europaea* NirK plays an important  
334 role in both nitrifier denitrification and NH<sub>3</sub> oxidation (27), and is known to be expressed during both O<sub>2</sub>-  
335 replete and -limited growth (29, 30, 35). However, under O<sub>2</sub>-limited conditions, *nirK* was amongst the  
336 genes with the largest decrease in transcript numbers (4.2-fold) observed in this study (Fig. 5, Table S2).  
337 In *N. europaea*, *nirK* transcription is regulated via the nitrite-sensitive transcriptional repressor *nsrA* (30).  
338 Thus, in contrast to the *nirK* of many denitrifiers (77), *nirK* transcription in *N. europaea* is regulated in  
339 response to NO<sub>2</sub><sup>-</sup> concentration and not NO or O<sub>2</sub> availability (31, 34, 48). The reduced O<sub>2</sub> supply during  
340 O<sub>2</sub>-limited growth resulted in a ~50% decrease in total NH<sub>3</sub> oxidized and a ~60% reduction in steady-  
341 state NO<sub>2</sub><sup>-</sup> concentration (Fig. 2, Table 1). The decrease in NO<sub>2</sub><sup>-</sup> concentration during O<sub>2</sub>-limited growth  
342 likely induced the transcription of *nsrA*, which was significantly (2.1-fold) upregulated (Fig. 5, Table S2).  
343 Therefore the large decrease in *nirK* transcription observed here may be due to the lower NO<sub>2</sub><sup>-</sup>  
344 concentrations and not a direct reflection of overall nitrifier denitrification activity. This hypothesis is  
345 consistent with the observation that NirK is not essential for NO<sub>2</sub><sup>-</sup> reduction to NO in *N. europaea*, and  
346 the presence of a not yet identified nitrite reductase in this organism. Previously, it has been shown that  
347 *N. europaea nirK* knockout mutants are still able to enzymatically produce NO and N<sub>2</sub>O (29, 35), even if  
348 hydrazine is oxidized by HAO instead of hydroxylamine as an electron donor (35). In addition, NO and  
349 N<sub>2</sub>O formation has also been observed in the AOB *Nitrosomonas communis* that does not encode *nirK*  
350 (12). The other three genes in the NirK cluster (*ncgCBA*) were differentially transcribed, with *ncgC* and  
351 *ncgB* being transcribed at lower levels (2 and 1.3-fold respectively), while *ncgA* was transcribed at a  
352 significantly higher level (2.6-fold) during O<sub>2</sub>-limited growth. The role of *ncgCBA* in *N. europaea* has not



353 been fully elucidated, but all three genes have previously been implicated in the metabolism or tolerance  
354 of N-oxides and NO<sub>2</sub><sup>-</sup> (31).

355 In contrast, transcripts of the *norCBQD* gene cluster, encoding for the iron-containing, cyt c  
356 dependent cNOR type NO reductase, were present at slightly higher (1.2- to 1.5-fold) but not significantly  
357 different levels during O<sub>2</sub>-limited growth (Fig. 5, Table S2). Previous research has demonstrated that in  
358 *N. europaea* cNOR functions as the main NO reductase under anoxic and hypoxic conditions (35).  
359 Interestingly, all components of the proposed alternative heme-copper containing NO reductase (sNOR),  
360 including the NO/low oxygen sensor *senC* (24) were transcribed at significantly higher levels (2.7- to  
361 10.8-fold) during O<sub>2</sub>-limited growth (Fig. 6, Table S2). Therefore, it is possible that the phenotype  
362 describing cNOR as the main NO reductase in *N. europaea* (35) was a product of short incubation times  
363 and that during longer term O<sub>2</sub>-limited conditions sNOR contributes to NO reduction during nitrifier  
364 denitrification. Another possibility is that the increased transcription of sNOR observed here during O<sub>2</sub>-  
365 limited growth is primarily related to respiration and not NO reductase activity.

366

### 367 **3.7 Respiratory chain and terminal oxidases**

368 *N. europaea* encodes a low affinity cyt c aa<sub>3</sub> (A1-type) HCO, but not a high affinity *cbb*<sub>3</sub>-type (C-  
369 type) cyt c HCO encoded by other AOB such as *N. eutropha* or *Nitrosomonas* sp. GH22 (28, 50, 52).  
370 Significantly higher numbers of transcripts (1.7- to 3.0-fold) of all three subunits of the cyt c aa<sub>3</sub> HCO and  
371 the cyt c-oxidase assembly gene *ctaG* were detected during O<sub>2</sub>-limited growth (Fig. 6, Table S2).  
372 Increased transcription of the terminal oxidase was expected, as it is a common bacterial response to O<sub>2</sub>  
373 limitation (78). In addition, transcripts of all three subunits of the proton translocating cyt *bc*1 complex  
374 (Complex III) were present in higher numbers (Table S2). The NADPH dehydrogenase (Complex I) and  
375 the ATP synthase (Complex V) encoding genes were transcribed at similar levels during both growth  
376 conditions (Table S2).

377 As mentioned above, transcripts of both subunits of sNOR (*norSY* previously called *coxB*<sub>2A<sub>2</sub>),  
378 and the NO/low oxygen sensor *senC* were present at significantly higher numbers (2.7- to 10.8-fold)</sub>



379 during O<sub>2</sub>-limited growth (Fig. 6, Table S2). The NO reductase function of the sNOR enzyme complex  
380 was proposed based on domain similarities between NorY and NorB (24, 32). Yet, *norY* phylogenetically  
381 affiliates with and structurally resembles B-type HCOs (79). In addition, NorY does not contain the five  
382 well-conserved and functionally important NorB glutamate residues (80), which are present in the  
383 canonical NorB of *N. europaea*. All HCOs studied thus far can reduce O<sub>2</sub> to H<sub>2</sub>O, and couple this  
384 reaction to proton translocation, albeit B- and C-type HCOs translocate fewer protons per mol O<sub>2</sub>  
385 reduced than A-type HCOs (81). Notably, NO reduction to N<sub>2</sub>O is a known side reaction of the A2-, B-  
386 and C-, but not A1-type HCOs (82-84). The transcriptional induction of sNOR during O<sub>2</sub>-limited growth  
387 reported here, as well as the high O<sub>2</sub> affinity of previously studied B-type HCOs (85) indicate that sNOR  
388 might function as a high affinity terminal oxidase in *N. europaea* and possibly other sNOR-encoding  
389 AOB. Furthermore, functionally characterized B-type HCOs display a lower NO turnover rate than the  
390 more widespread high affinity C-type HCOs (82, 83). Taken together, these observations indicate that B-  
391 type HCOs, like sNOR, are ideal for scavenging O<sub>2</sub> during O<sub>2</sub>-limited growth conditions that coincide with  
392 elevated NO concentrations, which would impart a fitness advantage for AOB growing under these  
393 conditions. Lastly, the NOR of *Roseobacter denitrificans* structurally resembles cNOR, but contains a  
394 HCO-like heme-cooper center in place of the heme-iron center of canonical cNORs. Interestingly, this  
395 cNOR readily reduces O<sub>2</sub> to H<sub>2</sub>O, but displays very low NO reductase activity (86, 87). Therefore, in line  
396 with previous hypotheses (82, 86), the presence of a heme-copper center in NOR/HCO superfamily  
397 enzymes, such as the sNOR of *N. europaea*, may indicate O<sub>2</sub> reduction as the primary enzymatic  
398 function. Notably, a recent study provided the first indirect evidence of NO reductase activity of sNOR in  
399 the marine NOB, *Nitrococcus mobilis* (88). However, further research is needed to resolve the primary  
400 function of sNOR in nitrifying microorganisms.

401

#### 402 **4 Conclusions**

403 In this study, we examined the transcriptional response of *N. europaea* to continuous growth  
404 under steady-state NH<sub>3</sub>- and O<sub>2</sub>-limited conditions. Overall, O<sub>2</sub>-limited growth resulted in a decreased

405 growth yield, but did not invoke a significant stress response in *N. europaea*. On the contrary, a reduced  
406 need for oxidative stress defense was evident. Interestingly, no clear differential regulation was observed  
407 for genes classically considered to be involved in aerobic NH<sub>3</sub> oxidation. In contrast, a strong decrease  
408 in transcription of RuBisCO encoding genes during O<sub>2</sub>-limited growth was observed, suggesting that  
409 control of CO<sub>2</sub> fixation in *N. europaea* is exerted at the level of RuBisCO enzyme concentration.  
410 Furthermore, the remarkably strong increase in transcription of the genes encoding for sNOR (B-type  
411 HCO) indicates this enzyme complex might function as a high-affinity terminal oxidase in *N. europaea*  
412 and other AOB. Overall, despite lower growth yield, *N. europaea* successfully adapts to growth under  
413 hypoxic conditions by regulating core components of its carbon fixation and respiration machinery.

414

#### 415 **Acknowledgements**

416 We thank the Center for Genome Research and Biocomputing at Oregon State University for the  
417 sequencing services. We also thank Fillipa Sousa for helpful discussions. This work was funded by  
418 Department of Energy (DOE) award ER65192 (co-principal investigators, L.A.S-S. and P.J.B.). C.J.S.,  
419 H.D., and M.W. were supported by the Comammox Research Platform of the University of Vienna. In  
420 addition, M.W. and C.J.S. were supported by the European Research Council (ERC) via the Advanced  
421 Grant project NITRICARE 294343, and C.J.S. and H.D. were supported by Austrian Science Fund  
422 (FWF) grant 30570-B29. A.T.G and D.W. were supported by the ERC Starting Grant 636928, under the  
423 European Union's Horizon 2020 research and innovation program.

424

425 **References**

- 426 1. **Kuypers MMM, Marchant HK, Kartal B.** 2018. The microbial nitrogen-cycling network. *Nat Rev*  
427 *Microbiol* **16**:263–276.
- 428 2. **Daims H, Lebedeva EV, Pjevac P, Han P, Herbold C, Albertsen M, Jehmlich N, Palatinszky**  
429 **M, Vierheilig J, Bulaev A, Kirkegaard RH, von Bergen M, Rattei T, Bendinger B, Nielsen PH,**  
430 **Wagner M.** 2015. Complete nitrification by *Nitrospira* bacteria. *Nature* **528**:504–506.
- 431 3. **van Kessel MAHJ, Speth DR, Albertsen M, Nielsen PH, den Camp HJO, Kartal B, Jetten**  
432 **MSM, Lücker S.** 2015. Complete nitrification by a single microorganism. *Nature* **528**:555–559.
- 433 4. **Kitzinger K, Koch H, Lücker S, Sedlacek CJ, Herbold C, Schwarz J, Daebeler A, Mueller AJ,**  
434 **Lukumbuzya M, Romano S, Leisch N, Karst SM, Kirkegaard R, Albertsen M, Nielsen PH,**  
435 **Wagner M, Daims H.** 2018. Characterization of the first “Candidatus Nitrotoga” isolate reveals  
436 metabolic versatility and separate evolution of widespread nitrite-oxidizing bacteria. *MBio*  
437 **9**:e01186-18. doi:10.1128/mBio.01186-18.
- 438 5. **Galloway JN, Townsend AR, Erisman JW, Bekunda M, Cai Z, Freney JR, Martinelli LA,**  
439 **Seitzinger SP, Sutton MA.** 2008. Transformation of the nitrogen cycle: recent trends, questions,  
440 and potential solutions. *Science* **320**:889–892.
- 441 6. **Dundee L, Hopkins DW.** 2001. Different sensitivities to oxygen of nitrous oxide production by  
442 *Nitrosomonas europaea* and *Nitrosolobus multiformis*. *Soil Biol Biochem* **33**:1563–1565.
- 443 7. **Shaw LJ, Nicol GW, Smith Z, Fear J, Prosser JI, Baggs EM.** 2006. *Nitrosospira* spp. Can  
444 produce nitrous oxide via a nitrifier denitrification pathway. *Environ Microbiol* **8**:214–222.
- 445 8. **Ahn JH, Kwan T, Chandran K.** 2011. Comparison of partial and full nitrification processes  
446 applied for treating high-strength nitrogen wastewaters: microbial ecology through nitrous oxide  
447 production. *Environ Technol* **45**:2734–2740.
- 448 9. **Kool DM, Dolfing J, Wrage N, Van Groenigen JW.** 2011. Nitrifier denitrification as a distinct  
449 and significant source of nitrous oxide from soil. *Soil Biol Biochem* **43**:174–178.
- 450 10. **Santoro AE, Buchwald C, McIlvin MR, Casciotti KL.** 2011. Isotopic signature of N<sub>2</sub>O produced  
451 by marine ammonia-oxidizing archaea. *Science* **333**:1282–1285.

- 452 11. **Stein LY**. 2011. Surveying N<sub>2</sub>O-producing pathways in bacteria, p 131-152. *In* Klotz MG (ed),  
453 Methods in enzymology. Academic Press, CA.
- 454 12. **Kozlowski JA, Kits KD, Stein LY**. 2016. Comparison of nitrogen oxide metabolism among  
455 diverse ammonia-oxidizing bacteria. *Front Microbiol* **7**:1090. doi:10.3389/fmicb.2016.01090.
- 456 13. **Kits KD, Jung MY, Vierheilig J, Pjevac P, Sedlacek CJ, Liu S, Herbold C, Stein LY, Richter**  
457 **A, Wissel H, Brüggemann N, Wagner M, Daims H**. 2019. Low yield and abiotic origin of N<sub>2</sub>O  
458 formed by the complete nitrifier *Nitrospira inopinata*. *Nat Commun* **10**:1836. doi:10.1038/s41467-  
459 019-09790-x.
- 460 14. **Schreiber F, Wunderlin P, Udert KM, Wells GF**. 2012. Nitric oxide and nitrous oxide turnover in  
461 natural and engineered microbial communities: biological pathways, chemical reactions, and  
462 novel technologies. *Front Microbiol* **3**:372. doi: 10.3389/fmicb.2012.00372.
- 463 15. **Heil J, Vereecken H, Brüggemann N**. 2016. A review of chemical reactions of nitrification  
464 intermediates and their role in nitrogen cycling and nitrogen trace gas formation in soil. *Eur J Soil*  
465 *Sci* **67**:23–39.
- 466 16. **Hooper AB**. 1968. A nitrite-reducing enzyme from *Nitrosomonas europaea*. Preliminary  
467 characterization with hydroxylamine as electron donor. *Biochim Biophys Acta* **162**:49–65.
- 468 17. **Hooper AB, Terry KR**. 1977. Hydroxylamine oxidoreductase from *Nitrosomonas*: inactivation by  
469 hydrogen peroxide. *Biochem Moscow* **16**:455–459.
- 470 18. **Hooper AB, Terry KR, Maxwell PC**. 1977. Hydroxylamine oxidoreductase of *Nitrosomonas*.  
471 Oxidation of diethyldithiocarbamate concomitant with stimulation of nitrite synthesis. *Biochim*  
472 *Biophys Acta* **462**:141–152.
- 473 19. **Anderson IC, Poth M, Homstead J, Burdige D**. 1993. A comparison of NO and N<sub>2</sub>O production  
474 by the autotrophic nitrifier *Nitrosomonas europaea* and the heterotrophic nitrifier *Alcaligenes*  
475 *faecalis*. *Appl Environ Microbiol* **59**:3525–3533.
- 476 20. **Caranto JD, Lancaster KM**. 2017. Nitric oxide is an obligate bacterial nitrification intermediate  
477 produced by hydroxylamine oxidoreductase. *PNAS* **114**:8217–8222.

- 478       **21. Mellbye BL, Giguere AT, Murthy GS, Bottomley PJ, Sayavedra-Soto LA, Chaplen FW.** 2018.  
479       Genome-scale, constraint-based modeling of nitrogen oxide fluxes during coculture of  
480       *Nitrosomonas europaea* and *Nitrobacter winogradskyi*. *mSystems* **3**:e00170-17.  
481       doi:10.1128/mSystems.00170-17.
- 482       **22. Poth M, Focht DD.** 1985. <sup>15</sup>N kinetic analysis of N<sub>2</sub>O production by *Nitrosomonas europaea*: an  
483       examination of nitrifier denitrification. *Appl Environ Microbiol* **49**:1134–1141.
- 484       **23. Wrage N, Velthof GL, van Beusichem ML, Oenema O.** 2001. Role of nitrifier denitrification in  
485       the production of nitrous oxide. *Soil Biol Biochem* **33**:1723–1732.
- 486       **24. Klotz MG, Stein LY.** 2008. Nitrifier genomics and evolution of the nitrogen cycle. *FEMS Microbiol*  
487       *Lett* **278**:146–156.
- 488       **25. Giguere AT, Taylor AE, Suwa Y, Myrold DD, Bottomley PJ.** 2017. Uncoupling of ammonia  
489       oxidation from nitrite oxidation: impact upon nitrous oxide production in non-cropped Oregon  
490       soils. *Soil Biol Biochem* **104**:30–38.
- 491       **26. Schmidt I, van Spanning RJM, Jetten MSM.** 2004. Denitrification and ammonia oxidation by  
492       *Nitrosomonas europaea* wild-type, and NirK- and NorB-deficient mutants. *Microbiology*  
493       **150**:4107–4114.
- 494       **27. Cantera JJJ, Stein LY.** 2007. Role of nitrite reductase in the ammonia-oxidizing pathway of  
495       *Nitrosomonas europaea*. *Arch Microbiol* **188**:349–354.
- 496       **28. Chain P, Lamerdin J, Larimer F, Regala W, Lao V, Land M, Hauser L, Hooper A, Klotz M,**  
497       **Norton J, Sayavedra-Soto L, Arciero D, Hommes N, Whittaker M, Arp D.** 2003. Complete  
498       genome sequence of the ammonia-oxidizing bacterium and obligate chemolithoautotroph  
499       *Nitrosomonas europaea*. *J Bacteriol* **185**:2759–2773.
- 500       **29. Beaumont HJ, Hommes NG, Sayavedra-Soto LA, Arp DJ, Arciero DM, Hooper AB,**  
501       **Westerhoff HV, van Spanning RJM.** 2002. Nitrite reductase of *Nitrosomonas europaea* is not  
502       essential for production of gaseous nitrogen oxides and confers tolerance to nitrite. *J Bacteriol*  
503       **184**:2557–2560.

- 504 30. **Beaumont HJ, Lens SI, Reijnders WN, Westerhoff HV, van Spanning RJ.** 2004. Expression  
505 of nitrite reductase in *Nitrosomonas europaea* involves NsrR, a novel nitrite-sensitive  
506 transcription repressor. *Mol Microbiol* **54**:148–158.
- 507 31. **Beaumont HJ, Lens SI, Westerhoff HV, van Spanning RJ.** 2005. Novel *nirK* cluster genes in  
508 *Nitrosomonas europaea* are required for NirK-dependent tolerance to nitrite. *J Bacteriol*  
509 **187**:6849–6851.
- 510 32. **Cho CMH, Yan T, Liu X, Wu L, Zhou J, Stein LY.** 2006. Transcriptome of a *Nitrosomonas*  
511 *europaea* mutant with a disrupted nitrite reductase gene (*nirK*). *Appl Environ Microbiol* **72**:4450–  
512 4454.
- 513 33. **Pellitteri-Hahn MC, Halligan BD, Scaif M, Smith L, Hickey WJ.** 2011. Quantitative proteomic  
514 analysis of the chemolithoautotrophic bacterium *Nitrosomonas europaea*: comparison of growing-  
515 and energy-starved cells. *J Proteomics* **74**:411–419.
- 516 34. **Yu R, Chandran K.** 2010. Strategies of *Nitrosomonas europaea* 19718 to counter low dissolved  
517 oxygen and high nitrite concentrations. *BMC Microbiol*, **10**:70. doi: 10.1186/1471-2180-10-70.
- 518 35. **Kozlowski JA, Price J, Stein LY.** 2014. Revision of N<sub>2</sub>O-producing pathways in the ammonia-  
519 oxidizing bacterium, *Nitrosomonas europaea* ATCC 19718. *Appl Environ Microbiol* **80**:4930-4935.
- 520 36. **Yu R, Perez-Garcia O, Lu H, Chandran, K.** 2018. *Nitrosomonas europaea* adaptation to anoxic-  
521 oxic cycling: insights from transcription analysis, proteomics and metabolic network modeling. *Sci*  
522 *Total Environ* **615**:1566–1573.
- 523 37. **Cua LS, Stein LY.** 2011. Effects of nitrite on ammonia-oxidizing activity and gene regulation in  
524 three ammonia-oxidizing bacteria. *FEMS Microbiol Lett* **319**:169-175.
- 525 38. **Upadhyay AK, Hooper AB, Hendrich MP.** 2006. NO reductase activity of the tetraheme  
526 cytochrome C<sub>554</sub> of *Nitrosomonas europaea*. *J Am Chem Soc* **128**:4330-4337.
- 527 39. **Caranto JD, Vilbert AC, Lancaster KM.** 2016. *Nitrosomonas europaea* cytochrome P460 is a  
528 direct link between nitrification and nitrous oxide emission. *PNAS* **113**:14704–14709.
- 529 40. **Lancaster KM, Caranto JD, Majer SH, Smith MA.** 2018. Alternative Bioenergy: Updates to and  
530 challenges in nitrification metalloenzymology. *Joule* **2**:421–441.

- 531 41. **McGarry JM, Pacheco A.** 2018. Upon further analysis, neither cytochrome c554 from  
532 *Nitrosomonas europaea* nor its F156A variant display NO reductase activity, though both proteins  
533 bind nitric oxide reversibly. *J Biol Inorg Chem* **23**:861–878.
- 534 42. **Kester RA, De Boer W, Laanbroek HJ.** 1997. Production of NO and N<sub>2</sub>O by pure cultures of  
535 nitrifying and denitrifying bacteria during changes in aeration. *Appl Environ Microbiol* **63**:3872–  
536 3877.
- 537 43. **Mellbye BL, Giguere A, Chaplen F, Bottomley PJ, Sayavedra-Soto LA.** 2016. Steady state  
538 growth under inorganic carbon limitation increases energy consumption for maintenance and  
539 enhances nitrous oxide production in *Nitrosomonas europaea*. *Appl Environ Microbiol* **82**:3310 –  
540 3318.
- 541 44. **Beyer S, Gilch S, Meyer O, Schmidt I.** 2009. Transcription of genes coding for metabolic key  
542 functions in *Nitrosomonas europaea* during aerobic and anaerobic growth. *J Mol Microbiol*  
543 *Biotechnol* **16**:187–197.
- 544 45. **Gvakharia BO, Permina EA, Gelfand MS, Bottomley PJ, Sayavedra-Soto LA, Arp DJ.** 2007.  
545 Global transcriptional response of *Nitrosomonas europaea* to chloroform and chloromethane.  
546 *Appl Environ Microbiol* **73**:3440–3445.
- 547 46. **Park S, Ely RL.** 2008. Genome-wide transcriptional responses of *Nitrosomonas europaea* to  
548 zinc. *Arch Microbiol* **189**:541–548.
- 549 47. **Kartal B, Wessels HJ, van der Biezen E, Francoijs KJ, Jetten MS, Klotz MG, Stein LY.** 2012.  
550 Effects of nitrogen dioxide and anoxia on global gene and protein expression in long-term  
551 continuous cultures of *Nitrosomonas europaea* C91. *Appl Environ Microbiol* **78**:4788–4794.
- 552 48. **Pérez J, Buchanan A, Mellbye B, Ferrell R, Chang JH, Chaplen F, Bottomley PJ, Arp DJ,**  
553 **Sayavedra-Soto LA.** 2015. Interactions of *Nitrosomonas europaea* and *Nitrobacter winogradskyi*  
554 grown in co-culture. *Arch Microbiol* **197**:79–89.
- 555 49. **Sayavedra-Soto LA, Arp DJ.** 2011. Ammonia-oxidizing Bacteria: Their biochemistry and  
556 molecular biology, p 11-38. *In* Nitrification, Ward BB, Arp DJ, Klotz MG (eds). ASM, Washington,  
557 DC.



- 558        50. **Stein LY, Arp DJ, Berube PM, Chain PS, Hauser L, Jetten MS, Klotz MG, Larimer FW,**  
559            **Norton JM, op den Camp HJ, Shin M, Wei X.** 2007. Whole-genome analysis of the ammonia-  
560            oxidizing bacterium, *Nitrosomonas eutropha* C91: implications for niche adaptation. Environ  
561            Microbiol **9**:2993–3007.
- 562        51. **Berg IA.** 2011. Ecological aspects of the distribution of different autotrophic CO<sub>2</sub> fixation  
563            pathways. Appl Environ Microbiol **77**:1925-1936.
- 564        52. **Sedlacek CJ, McGowan B, Suwa Y, Sayavedra-Soto LA, Laanbroek HJ, Stein LY, Norton**  
565            **JM, Klotz MG, Bollmann A.** 2019. A physiological and genomic comparison of *Nitrosomonas*  
566            cluster 6a and 7 ammonia-oxidizing bacteria. Microb Ecol. doi:10.1007/s00248-019-01378-8.
- 567        53. **Andrews TJ, Lorimer GH.** 1978. Photorespiration—still unavoidable?. FEBS Lett **90**:1–9.
- 568        54. **Badger MR, Bek EJ.** 2008. Multiple RuBisCo forms in proteobacteria: their functional  
569            significance in relation to CO<sub>2</sub> acquisition by the CBB cycle. J Exp Bot **59**:1525–1541.
- 570        55. **Hood-Nowotny R, Umana NHN, Inselbacher E, Oswald-Lachouani P, Wanek W.** 2010.  
571            Alternative methods for measuring inorganic, organic, and total dissolved nitrogen in soil. Soil Sci  
572            Soc Am J **74**:1018–1027.
- 573        56. **Li B, Ruotti V, Stewart RM, Thomson JA, Dewey CN.** 2010. RNA-Seq gene expression  
574            estimation with read mapping uncertainty. Bioinformatics **26**:493–500.
- 575        57. **Götz F, Pjevac P, Markert S, McNichol J, Becher D, Schweder T, Musmann M, Sievert SM.**  
576            2018. Transcriptomic and proteomic insight into the mechanism of cyclooctasulfur- versus  
577            thiosulfate-oxidation by the chemolithoautotroph *Sulfurimonas denitrificans*. Environ Microbiol  
578            **21**:244–258.
- 579        58. **Goreau TJ, Kaplan WA, Wofsy SC, McElroy MB, Valois FW, Watson SW.** 1980. Production of  
580            NO<sub>2</sub><sup>-</sup> and N<sub>2</sub>O by nitrifying bacteria at reduced concentrations of oxygen. Appl Environ Microbiol  
581            **40**:526–532.
- 582        59. **Liu S, Han P, Hink L, Prosser JI, Wagner M, Brüggemann N.** 2017. Abiotic conversion of  
583            extracellular NH<sub>2</sub>OH contributes to N<sub>2</sub>O emission during ammonia oxidation. Environ Sci Technol  
584            **51**:13122-13132.



- 585       **60. Prieto-Alamo MJ, Jurado J, Gallardo-Madueno R, Monje-Casas F, Holmgren A, Pueyo C.**  
586           2000. Transcriptional regulation of glutaredoxin and thioredoxin pathways and related enzymes in  
587           response to oxidative stress. *J Biol Chem* **275**:13398–13405.
- 588       **61. Coulter ED, Kurtz DM Jr.** 2001. A role for rubredoxin in oxidative stress protection in  
589           *Desulfovibrio vulgaris*: catalytic electron transfer to rubrerythrin and two-iron superoxide  
590           reductase. *Arch Biochem Biophys* **394**:76-86.
- 591       **62. Andrews SC, Robinson AK, Rodriguez-Quinones F.** 2003. Bacterial iron homeostasis. *FEMS*  
592           *Microbiol Rev* **27**:215-237.
- 593       **63. Rouhier N, Couturier J, Johnson MK, Jacquot JP.** 2010. Glutaredoxins: roles in iron  
594           homeostasis. *Trends Biochem Sci* **35**:43. doi:10.1016/j.tibs.2009.08.005.
- 595       **64. Wei X, Sayavedra-Soto LA, Arp DJ.** 2004. The transcription of the *cbb* operon in *Nitrosomonas*  
596           *europaea*. *Microbiology* **150**:1869–1879.
- 597       **65. Lorimer GH.** 1981. The carboxylation and oxygenation of ribulose 1,5-bisphosphate: the primary  
598           events in photosynthesis and photorespiration. *Annu Rev Plant Physiol* **32**:349–382.
- 599       **66. McNevin D, von Caemmerer S, Farquhar G.** 2006. Determining RuBisCO activation kinetics  
600           and other rate and equilibrium constants by simultaneous multiple non-linear regression of a  
601           kinetic model. *J Exp Bot* **57**:3883–3900.
- 602       **67. Jiang D, Khunjar WO, Wett B, Murthy SN, Chandran K.** 2015. Characterizing the metabolic  
603           trade-off in *Nitrosomonas europaea* in response to changes in inorganic carbon supply. *Environ*  
604           *Sci Technol* **49**:2523–2531.
- 605       **68. Terry KR, Hooper AB.** 1970. Polyphosphate and orthophosphate content of *Nitrosomonas*  
606           *europaea* as a function of growth. *J Bacteriol* **103**:199–206.
- 607       **69. Arp DJ, Sayavedra-Soto LA, Hommes NG.** 2002. Molecular biology and biochemistry of  
608           ammonia oxidation by *Nitrosomonas europaea*. *Arch Microbiol* **178**:250–255.
- 609       **70. Sayavedra-Soto LA, Hommes NG, Russell SA, Arp DJ.** 1996. Induction of ammonia  
610           monooxygenase and hydroxylamine oxidoreductase mRNAs by ammonium in *Nitrosomonas*  
611           *europaea*. *Mol Microbiol* **20**:541–548.

- 612 71. **Chandran K, Love NG**. 2008. Physiological state, growth mode, and oxidative stress play a role  
613 in Cd (II)-mediated inhibition of *Nitrosomonas europaea* 19718. *Appl Environ Microbiol* **74**:2447–  
614 2453.
- 615 72. **Whittaker M, Bergmann D, Arciero D, Hooper AB**. 2000. Electron transfer during the oxidation  
616 of ammonia by the chemolithotrophic bacterium *Nitrosomonas europaea*. *Biochim Biophys Acta*  
617 *Bioenerg* **1459**:346–355.
- 618 73. **Zorz JK, Kozlowski JA, Stein LY, Strous M, Kleiner M**. 2018. Comparative proteomics of three  
619 species of ammonia-oxidizing bacteria. *Front Microbiol* **9**:938. doi:10.3389/fmicb.2018.00938.
- 620 74. **Bollmann A, Sedlacek CJ, Norton J, Laanbroek HJ, Suwa Y, Stein LY, Klotz MG, Arp D,**  
621 **Sayavedra-Soto L, Lu M, Bruce D, Detter C, Tapia R, Han J, Woyke T, Lucas SM, Pitluck S,**  
622 **Pennacchio L, Nolan M, Land ML, Huntemann M, Deshpande S, Han C, Chen A, Kyrpides**  
623 **N, Mavromatis K, Markowitz V, Szeto E, Ivanova N, Mikhailova N, Pagani I, Pati A, Peters L,**  
624 **Ovchinnikova G, Goodwin LA**. 2013. Complete genome sequence of *Nitrosomonas* sp. Is79,  
625 an ammonia oxidizing bacterium adapted to low ammonium concentrations. *Stand Genomic Sci*  
626 **7**:469-482.
- 627 75. **Elmore BO, Bergmann DJ, Klotz MG, Hooper AB**. 2007. Cytochromes P460 and c'-beta; a  
628 new family of high-spin cytochromes c. *FEBS Lett* **581**:911–916.
- 629 76. **Zahn JA, Arciero DM, Hooper AB, Dispirito AA**. 1996. Cytochrome c' of *Methylococcus*  
630 *capsulatus* Bath. *Eur J Biochem* **240**:684–691.
- 631 77. **Zumft WG**. 1997. Cell biology and molecular basis of denitrification. *Microbiol Mol Biol Rev*  
632 **61**:533–616.
- 633 78. **Bueno E, Mesa S, Bedmar EJ, Richardson DJ, Delgado MJ**. 2012. Bacterial adaptation of  
634 respiration from oxic to microoxic and anoxic conditions: redox control. *Antioxid Redox Sign*  
635 **16**:819–852.
- 636 79. **Sousa FL, Alves RJ, Pereira-Leal JB, Teixeira M, Pereira MM**. 2011. A bioinformatics classifier  
637 and database for heme-copper oxygen reductases. *PLoS One*, **6**:e19117.  
638 doi:10.1371/journal.pone.0019117.

- 639        **80. Hino T, Matsumoto Y, Nagano S, Sugimoto H, Fukumori Y, Murata T, Iwata S, Shiro Y.**  
640            2010. Structural basis of biological N<sub>2</sub>O generation by bacterial nitric oxide reductase. *Science*  
641            **330**:1666-1670.
- 642        **81. Sousa FL, Alves RJ, Ribeiro MA, Pereira-Leal JB, Teixeira M, Pereira MM.** 2012. The  
643            superfamily of heme-copper oxygen reductases: types and evolutionary considerations. *Biochim*  
644            *Biophys Acta Bioenerg* **1817**:629–637.
- 645        **82. Giuffre A, Stubauer G, Sarti P, Brunori M, Zumft WG, Buse G, Soulimane T.** 1999. The  
646            heme-copper oxidases of *Thermus thermophilus* catalyze the reduction of nitric oxide:  
647            evolutionary implications. *PNAS* **96**:14718–14723.
- 648        **83. Forte E, Urbani A, Saraste M, Sarti P, Brunori M, Giuffrè A.** 2001. The cytochrome *cbb3* from  
649            *Pseudomonas stutzeri* displays nitric oxide reductase activity. *Eur J Biochem* **268**:6486–6491.
- 650        **84. Pereira MM, Teixeira M.** 2004. Proton pathways, ligand binding and dynamics of the catalytic  
651            site in haem-copper oxygen reductases: a comparison between the three families. *Biochim*  
652            *Biophys Acta Bioenerg* **1655**:340–346.
- 653        **85. Han H, Hemp J, Pace LA, Ouyang H, Ganesan K, Roh JH, Daldal F, Blanke SR, Gennis RB.**  
654            2011. Adaptation of aerobic respiration to low O<sub>2</sub> environments. *PNAS* **108**:14109–14114.
- 655        **86. Matsuda Y, Inamori KI, Osaki T, Eguchi A, Watanabe A, Kawabata SI, Iba K, Arata H.** 2002.  
656            Nitric oxide-reductase homologue that contains a copper atom and has cytochrome c-oxidase  
657            activity from an aerobic phototrophic bacterium *Roseobacter denitrificans*. *J Biochem* **131**:791–  
658            800.
- 659        **87. Zumft WG.** 2005. Nitric oxide reductases of prokaryotes with emphasis on the respiratory,  
660            heme-copper oxidase type. *J Inorg Biochem* **99**:194-215.
- 661        **88. Füssel J, Lückner S, Yilmaz P, Nowka B, van Kessel MAHJ, Bourceau P, Hach PF, Littmann**  
662            **S, Berg J, Spieck E, Daims H, Kuypers MMM, Lam P.** 2017. Adaptability as the key to success  
663            for the ubiquitous marine nitrite oxidizer *Nitrococcus*. *Sci Adv* **3**:e1700807.  
664            doi:10.1126/sciadv.1700807.

565 **Figures and Tables:**

566 **Table 1:** Comparison of *N. europaea* growth characteristics and  $\text{NH}_4^+$  to  $\text{NO}_2^-$  conversion stoichiometry during  $\text{NH}_3$ - and  $\text{O}_2$ -limited steady-  
 567 state growth. Letters *a* and *b* represent highly significant differences ( $p \leq 0.01$ ), and letters *c* and *d* represent significant differences ( $p \leq 0.05$ )  
 568 within parameters. Capital letters represent comparisons between 10-day periods, whereas lower case letters represent comparisons  
 569 between 3-day periods.

|                                                | Period [days] | $\text{OD}_{600}$ <sup>1</sup> | Input $\text{NH}_3$ <sup>2</sup> [mmol day <sup>-1</sup> ] | $\text{NH}_3$ consumed <sup>1</sup> [mmol day <sup>-1</sup> ] | Steady-state <sup>1</sup> $\text{NH}_4^+$ [mmol L <sup>-1</sup> ] | Steady-state <sup>1</sup> $\text{NO}_2^-$ [mmol L <sup>-1</sup> ] | N-balance <sup>1,3</sup> [mmol] | Ammonia oxidation rate <sup>1</sup> ( $q_{\text{NH}_3}$ ) [mmol gDCW <sup>-1</sup> h <sup>-1</sup> ] | Apparent growth yield <sup>1</sup> (Y) [gDCW mol <sup>-1</sup> $\text{NH}_3$ ] |
|------------------------------------------------|---------------|--------------------------------|------------------------------------------------------------|---------------------------------------------------------------|-------------------------------------------------------------------|-------------------------------------------------------------------|---------------------------------|------------------------------------------------------------------------------------------------------|--------------------------------------------------------------------------------|
| <b><math>\text{NH}_3</math>-limited growth</b> | 7 -16         | 0.15 +0.01                     | 14.4                                                       | 14.2 +0.1                                                     | 0.9 +0.5                                                          | 60.1 +1.4                                                         | 61.0 +1.7 <sup>A</sup>          | 24.04 +0.93 <sup>C</sup>                                                                             | 0.42 +0.02 <sup>C</sup>                                                        |
|                                                | 9-11          | 0.15 ±0.004                    | 14.4                                                       | 14.2 ±0.1                                                     | 0.9 ±0.4                                                          | 59.1 ±1.4                                                         | 60.0 ±1.8 <sup>c</sup>          | 24.73 ±0.53 <sup>c</sup>                                                                             | 0.40 ±0.01 <sup>c</sup>                                                        |
| <b><math>\text{O}_2</math>-limited growth</b>  | 23-32         | 0.07 +0.01                     | 14.4                                                       | 7.5 +0.4                                                      | 28.9 +1.5                                                         | 24.1 +0.8                                                         | 52.8 +1.8 <sup>B</sup>          | 26.44 +2.28 <sup>D</sup>                                                                             | 0.38 +0.03 <sup>D</sup>                                                        |
|                                                | 28-30         | 0.07 ±0.0005                   | 14.4                                                       | 7.5 ±0.3                                                      | 28.6 ±1.1                                                         | 24.3 ±1.4                                                         | 52.9 ±2.4 <sup>d</sup>          | 28.51 ±1.13 <sup>d</sup>                                                                             | 0.35 ±0.01 <sup>d</sup>                                                        |

570 <sup>1</sup>Average values of 3 sampling days or 10 day steady-state period, ± standard deviation (Table S1).

571 <sup>2</sup>The  $\text{NH}_4^+$  concentration of the influx medium (60 mmol L<sup>-1</sup>) multiplied by the influx rate (0.24 L day<sup>-1</sup>).

572 <sup>3</sup>Sum of effluent  $\text{NH}_4^+$  and  $\text{NO}_2^-$  concentrations.

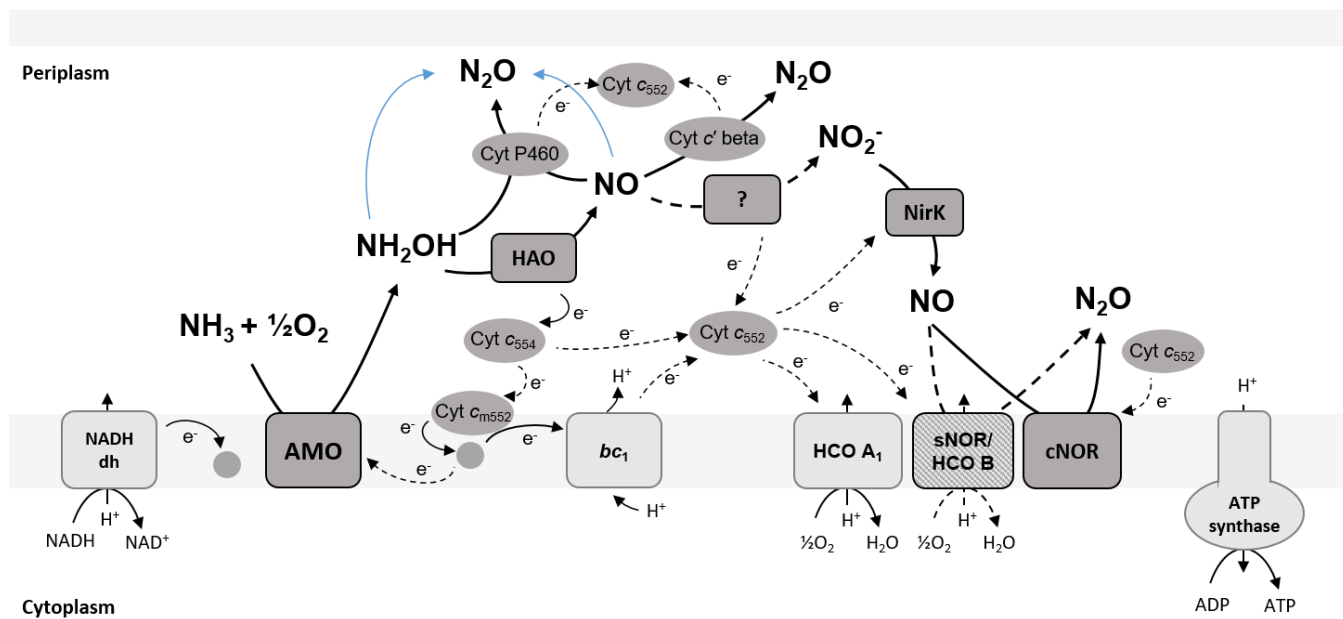

673

674 **Figure 1.** A simplified schematic of electron transport and NO/N<sub>2</sub>O producing pathways in *N. europaea*.

675 Solid lines indicate confirmed and dashed lines indicate postulated reactions or electron transfer

676 processes. Abiotic N<sub>2</sub>O production is indicated in blue. NADH dh - NADH dehydrogenase (complex I);

677 AMO - ammonia monooxygenase; HAO - hydroxylamine dehydrogenase; NirK - nitrite reductase; *bc1* -

678 cytochrome *bc1* complex (complex III); HCO A1 - heme-copper containing cytochrome c oxidase A1-

679 type (complex IV); sNOR/HCO B - heme-copper containing NO reductase/heme-copper containing

680 cytochrome c oxidase B-type (complex IV); cNOR - heme-iron containing nitric oxide reductase.

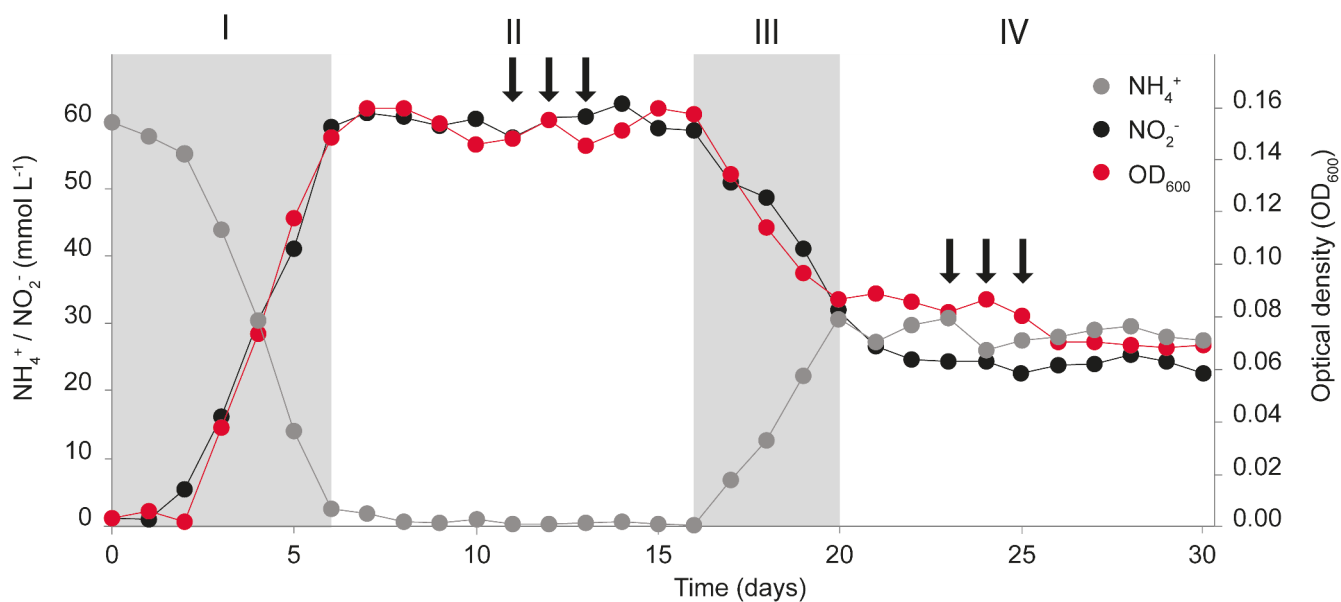

681

682 **Figure 2.** *N. europaea* culture dynamics and sampling scheme. *N. europaea* grown in a chemostat  
683 operated: in batch mode (I), under steady-state NH<sub>3</sub>-limited conditions as a continuous culture (II),  
684 transitioning from NH<sub>3</sub>-limited to O<sub>2</sub>-limited steady-state growth as a continuous culture (III), and under  
685 steady-state O<sub>2</sub>-limited conditions as a continuous culture (IV). Arrows indicate transcriptome sampling  
686 points during NH<sub>3</sub>-limited (days 9, 10 and 11) and O<sub>2</sub>-limited (days 28, 29 and 30) steady-state growth.

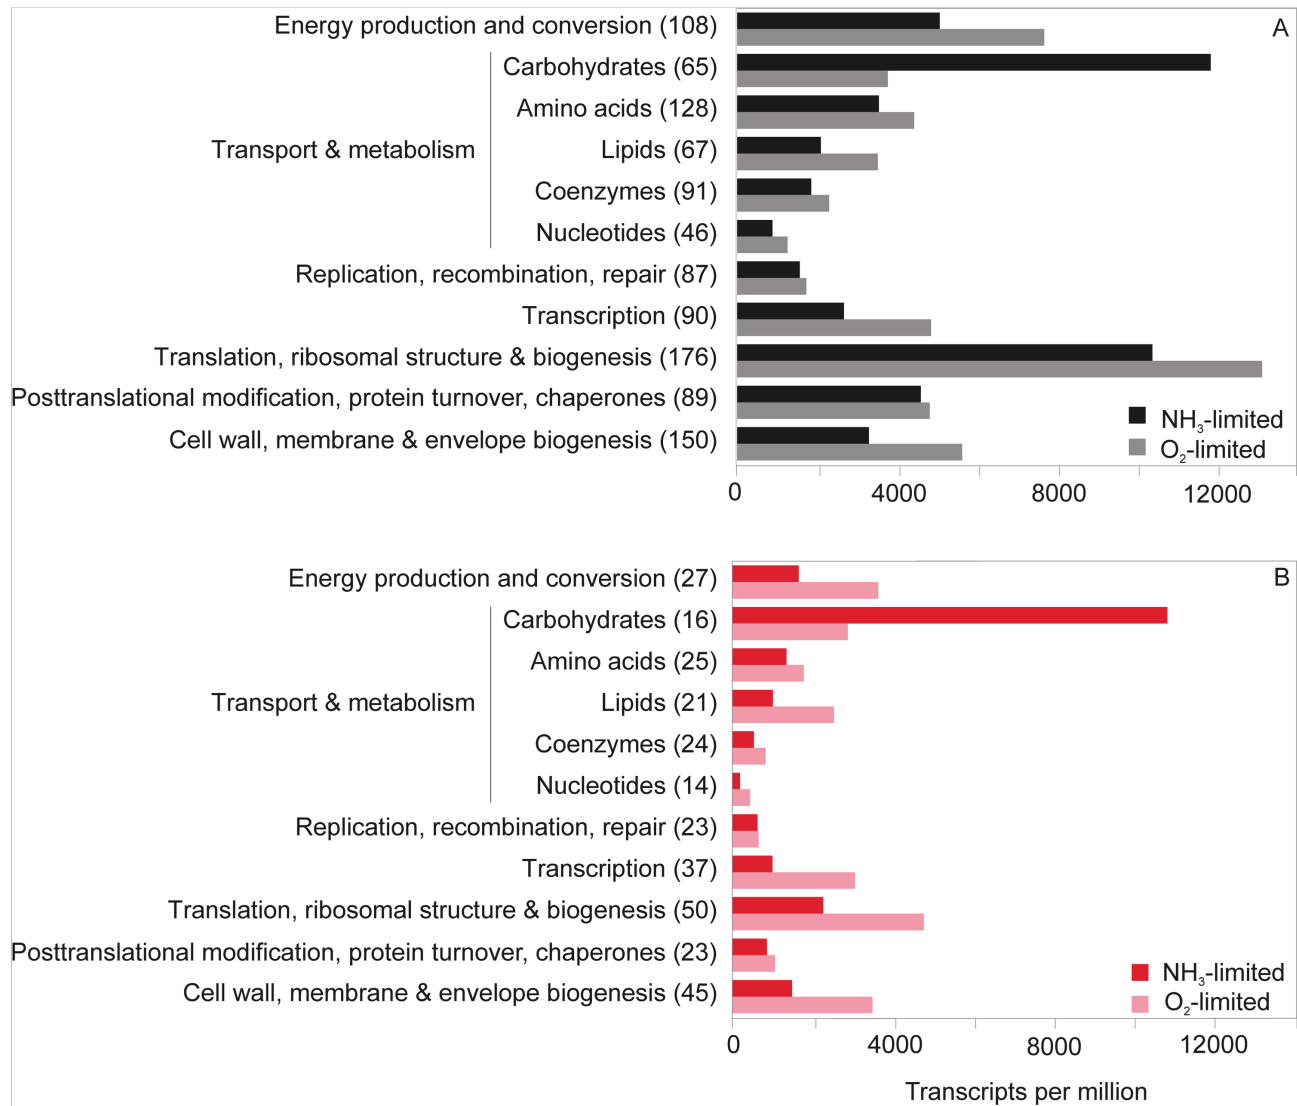

687

688 **Figure 3.** The sum of transcripts per million (TPM) for protein coding genes transcribed in given COG  
 689 categories (number of transcribed genes per category is given in parenthesis) in the *N. europaea*  
 690 transcriptomes: **A)** contribution and number of all transcribed genes in a given COG category; **B)**  
 691 contribution and number of statistically significantly differentially transcribed genes in a given COG  
 692 category.

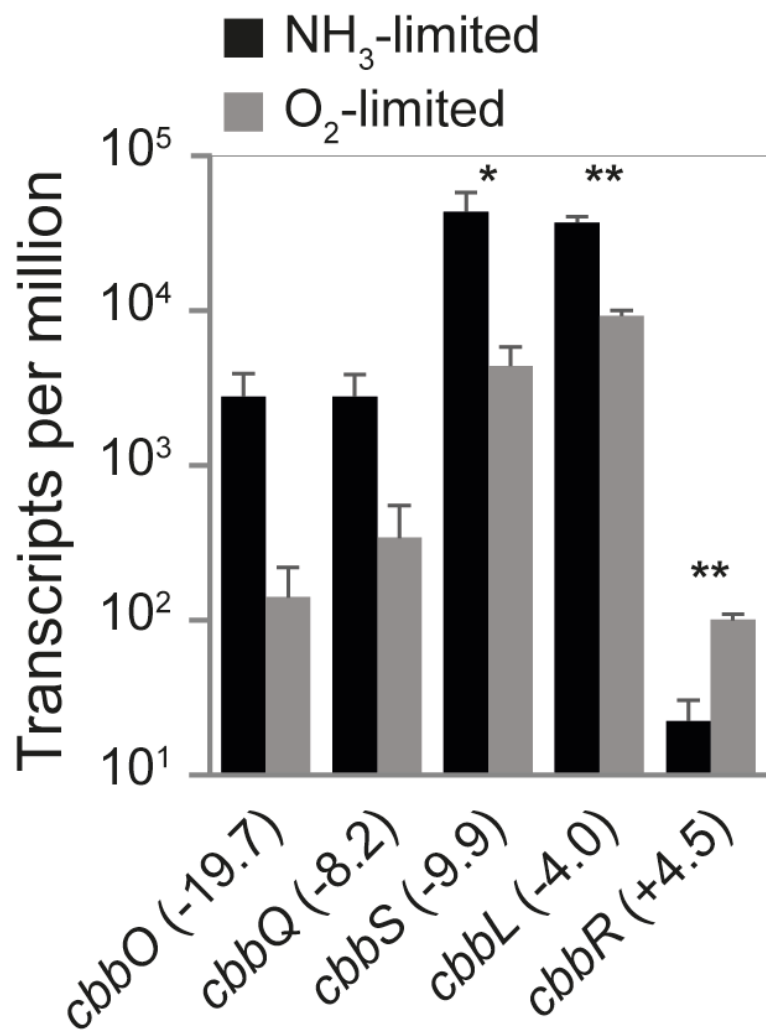

693

694 **Figure 4.** Mean TPM of all RuBisCO-encoding genes (*cbbOQSL*) and the corresponding transcriptional  
695 regulator (*cbbR*) in *N. europaea*. The fold change of gene transcription between NH<sub>3</sub>- versus O<sub>2</sub>-limited  
696 growth is given in parenthesis. Error bars represent the standard deviation between replicate samples  
697 (n=3) for each growth condition. A Welch's t-test was used to determine significantly differentially  
698 transcribed genes (\* p < 0.05; \*\* p < 0.01). For gene annotations refer to Table S2.



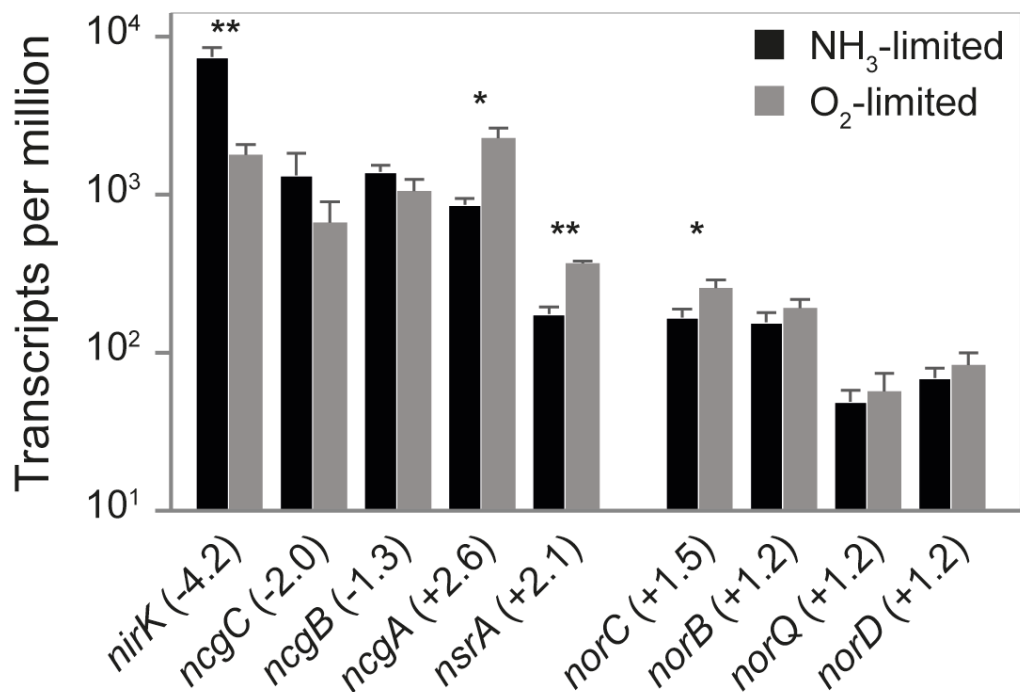

699

700 **Figure 5.** Mean TPMs of genes encoding the NirK and cNOR gene clusters in *N. europaea*. The fold  
701 change of gene transcription between NH<sub>3</sub>- versus O<sub>2</sub>-limited growth is given in parenthesis. Error bars  
702 represent the standard deviation between replicate samples (n=3) for each growth condition. A Welch's  
703 t-test was used to determine significantly differentially transcribed genes (\* p <0.05; \*\* p <0.01). For  
704 gene annotations refer to Table S2.

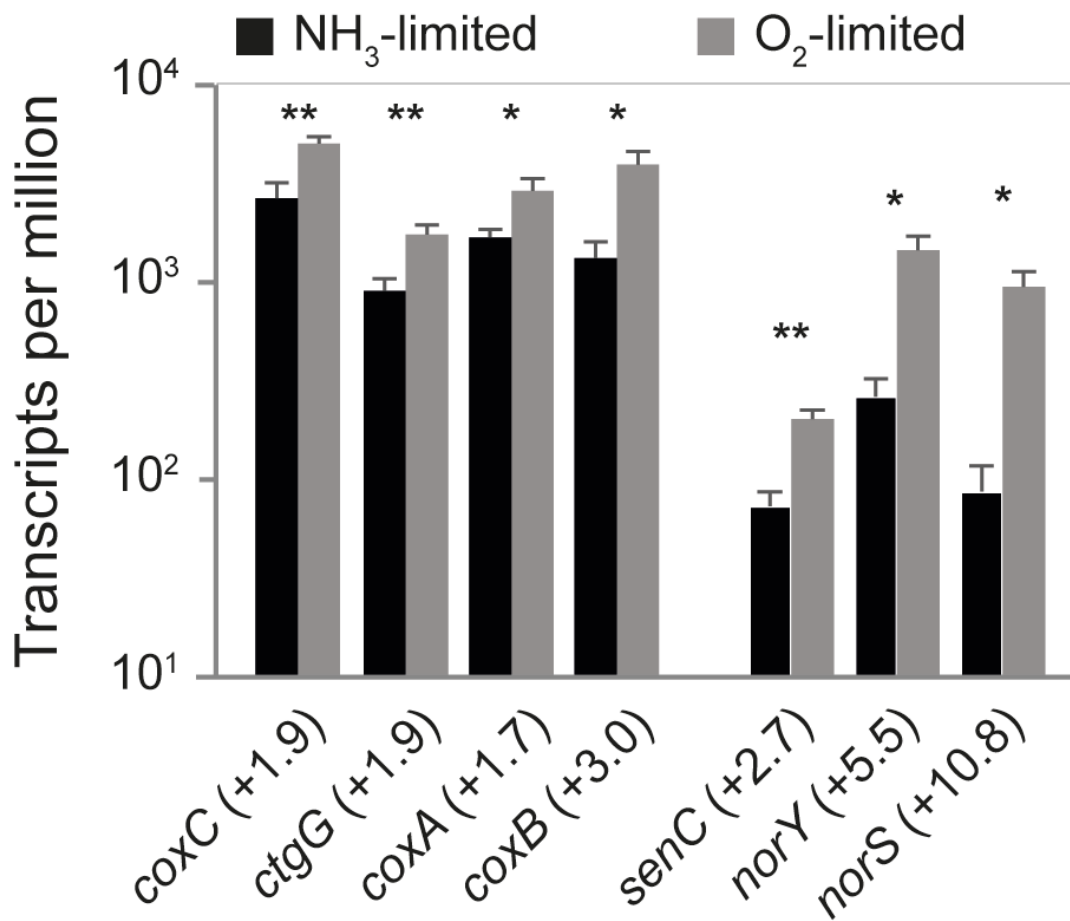

705

706 **Figure 6.** Mean TPMs of all genes encoding the A1-type and B-type HCO in *N. europaea*. The fold  
707 change of gene transcription between NH<sub>3</sub>- versus O<sub>2</sub>-limited growth is given in parenthesis. Error bars  
708 represent the standard deviation between replicate samples (n=3) for each growth condition. A Welch's  
709 t-test was used to determine significantly differentially transcribed genes (\* p < 0.05; \*\* p < 0.01). For  
710 gene annotations refer to Table S2.

711
